# Supplementary material for: Three plasma metabolite signatures for diagnosing high altitude pulmonary edema
Source: PubMed Central journal article supplement (PMC4602305; doi:10.1038/srep15126), 2015-10-13
Supplement: srep15126-s1.pdf [file srep15126-s1.pdf]

## Supplementary data

### Three plasma metabolite signatures for diagnosing high altitude pulmonary edema

Li Guo<sup>†,||</sup>, Guangguo Tan<sup>\*,‡,||</sup>, Ping Liu<sup>§</sup>, Huijie Li<sup>†</sup>, Lulu Tang<sup>⊥</sup>, Lan Huang<sup>\*,†</sup>, Qian Ren<sup>1,¶</sup>

<sup>†</sup>Department of Cardiology, Xinqiao Hospital, Third Military Medical University, Chongqing 400042, China

<sup>‡</sup>Department of Pharmaceutical Analysis, School of Pharmacy, Fourth Military Medical University, Xi'an 710032, China

<sup>§</sup>Department of outpatient, No. 22 Hospital of PLA, Geermu 816000, China

<sup>⊥</sup>State key laboratory of Medical Genetics and school of life sciences, central south university, changsha, 430013, China

<sup>¶</sup>Department of Medical Teaching, Daping Hospital, Third Military Medical University, Chongqing 400042, China

<sup>||</sup>Authors with equal contribution to the research.

---

<sup>1</sup> Corresponding Author: E-mail: renqian777@126.com; Tel.: +86-23-6875-7203; Fax: +86-23-6875-7203 (Ren Q). E-mail: lanhuang126@126.com (Huang L), E-mail: guangguotan@gmail.com; Tel.: +86-29-8477-6827 (Tan GG)

## Supplementary data

**Figure S1.** Representative chromatogram of the HPAE patient's plasma in ESI positive mode based on UHPLC-Q-TOFMS. (A) Representative total ion current (TIC) chromatogram. (B) The extracted ion chromatogram (EIC) of potential biomarkers.

**Figure S2.** Quality control (QC) plots of eleven randomly repeated runs of UHPLC-MS analysis by principle component analysis using component 1 and 2. Peak area deviation could be evaluated by distribution of the runs. X-axis: run order; Y-axis: standard deviation. (A) QC plot for the first component from UHPLC-MS data; (B) QC plot for the second component from UHPLC-MS data.

**Figure S3.** Identification of a selected marker ( $m/z$  400.3420). (A) The extracted ion chromatogram (EIC) of  $m/z$  400.3420. (B) The MS spectra of  $m/z$  400.3420. (C) The MS/MS spectra of  $m/z$  400.3420; the MS/MS fragmentation pattern of  $m/z$  400.3420 was acquired with collision energy at 15 eV.

**Figure S4.** Structures and MS/MS spectra of representative metabolites. (A) Glutamine, (B) Methionine, (C) Valine, (D) Hypoxanthine, (E) Inosine, (F) Isoleucine, (G) Sphingosine, (H) Palmitoylcarnitine, (I) LysoPC(18:2), (J) C8-ceramide, (K) Linoleamide, (L) LysoPC(22:5), (M) LysoPC(20:3) and (N) Palmitic amide.

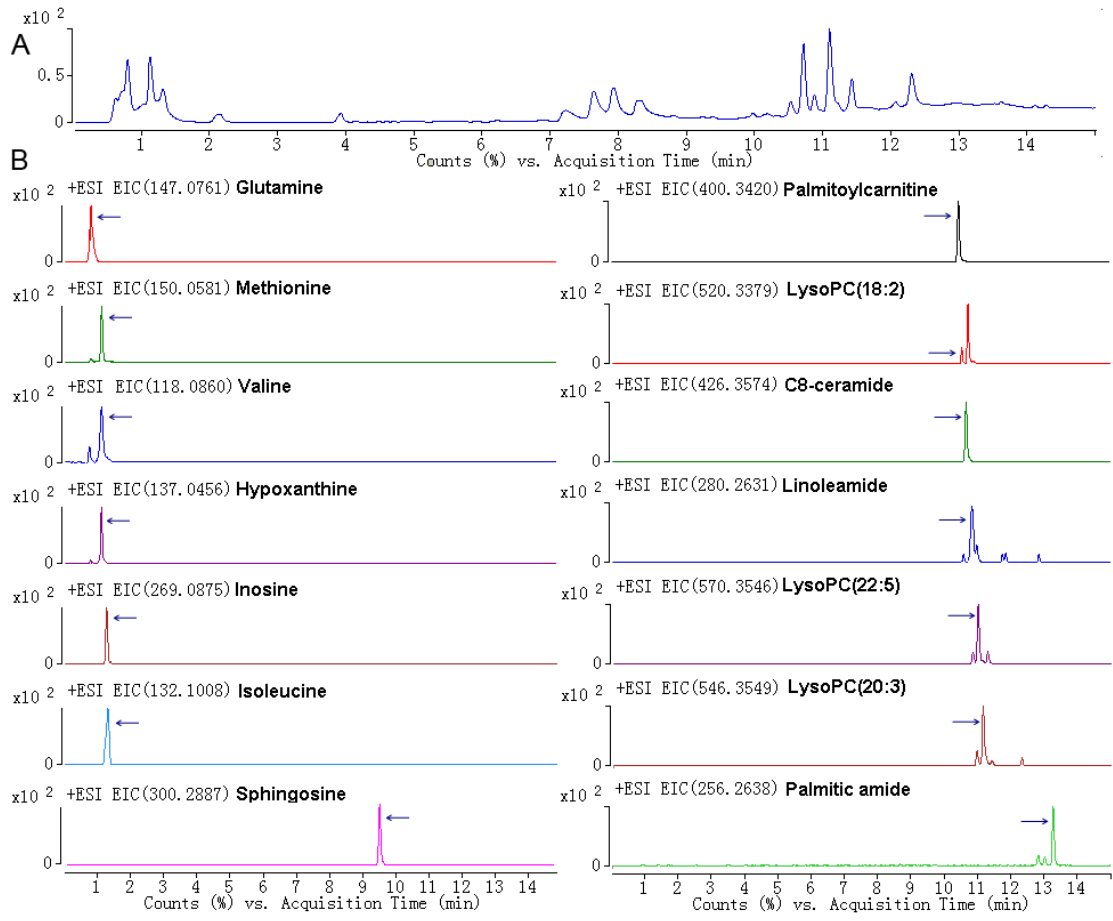

**Figure S1.** Representative chromatogram of the HPAE patient's plasma in ESI positive mode based on UHPLC-Q-TOFMS. (A) Representative total ion current (TIC) chromatogram. (B) The extracted ion chromatogram (EIC) of potential biomarkers.

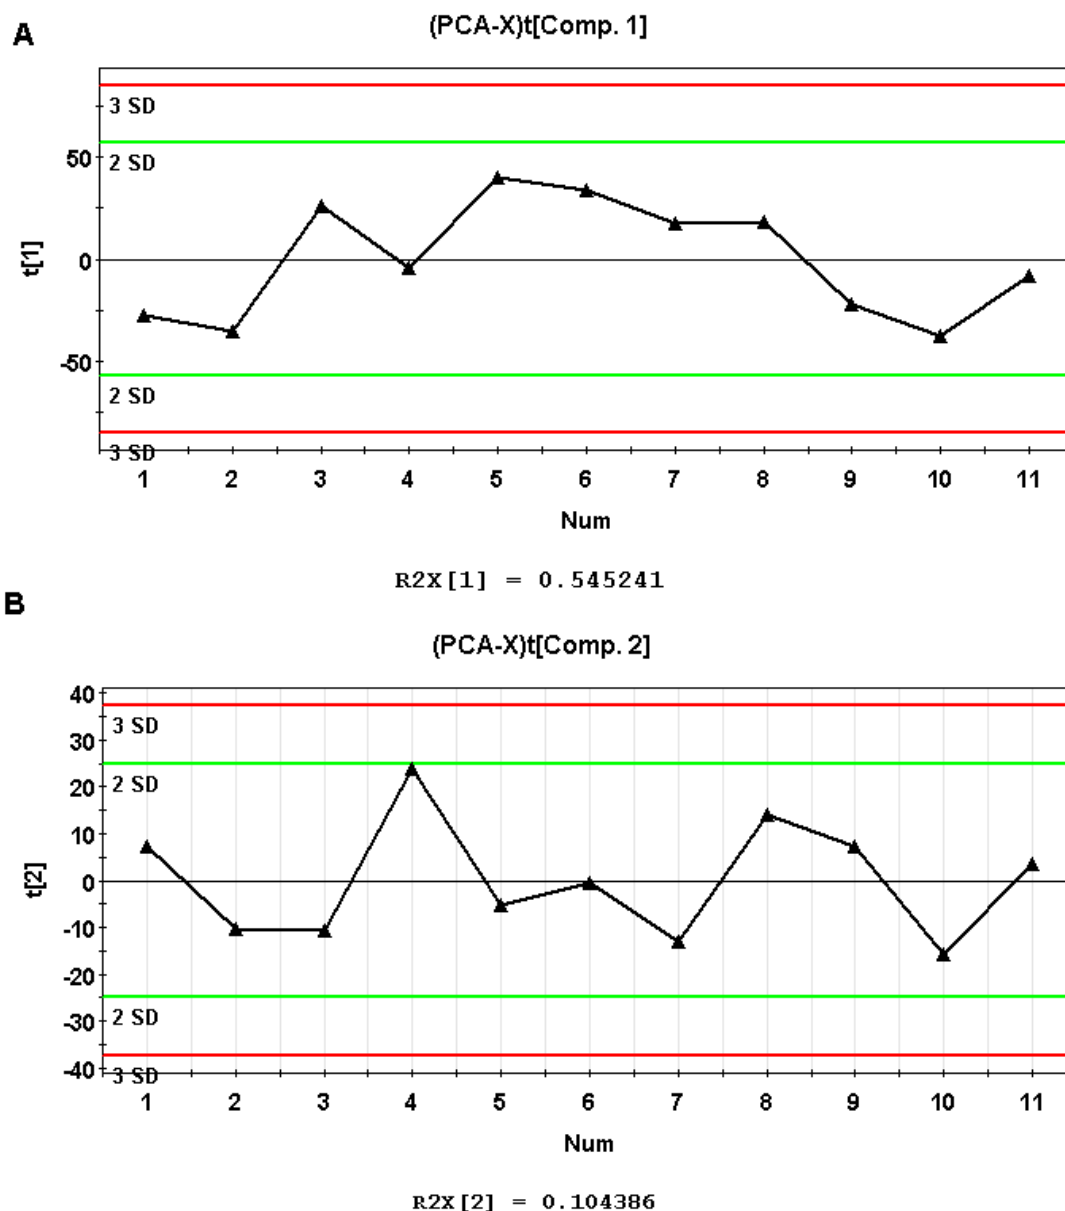

**Figure S2.** Quality control (QC) plots of eleven randomly repeated runs of UHPLC–MS analysis by principle component analysis using component 1 and 2. Peak area deviation could be evaluated by distribution of the runs. X-axis: run order; Y-axis: standard deviation. (A) QC plot for the first component from UHPLC–MS data; (B) QC plot for the second component from UHPLC–MS data.

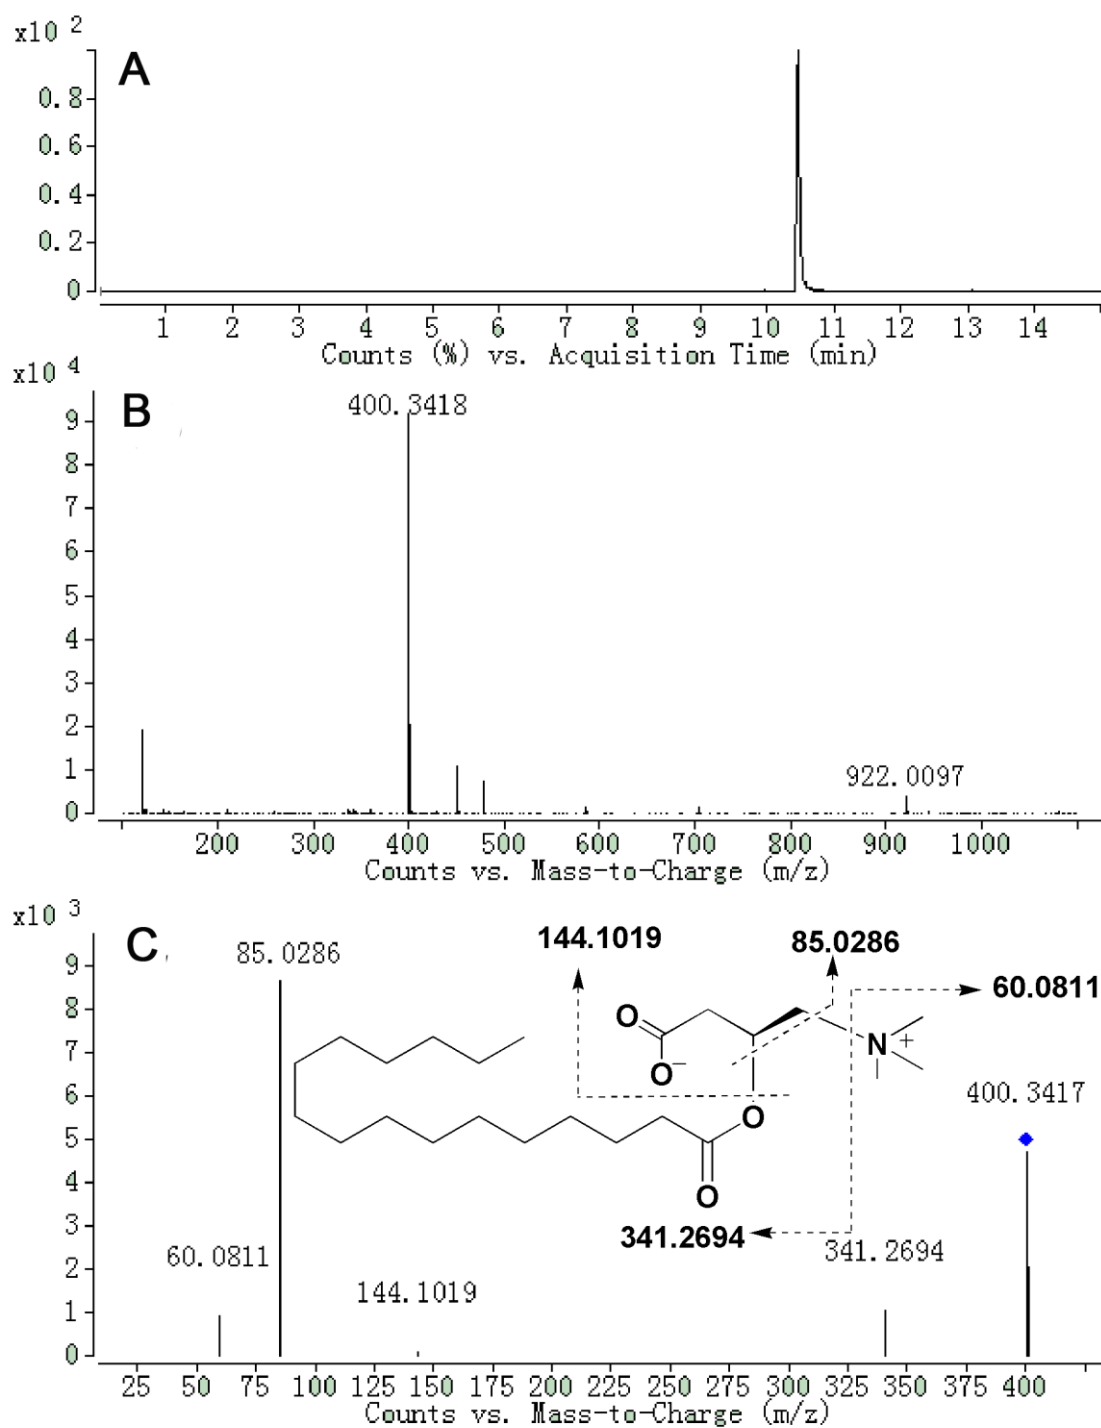

**Figure S3.** Identification of a selected marker ( $m/z$  400.3420). (A) The extracted ion chromatogram (EIC) of  $m/z$  400.3420. (B) The MS spectra of  $m/z$  400.3420. (C) The MS/MS spectra of  $m/z$  400.3420; the MS/MS fragmentation pattern of  $m/z$  400.3420 was acquired with collision energy at 15 eV.

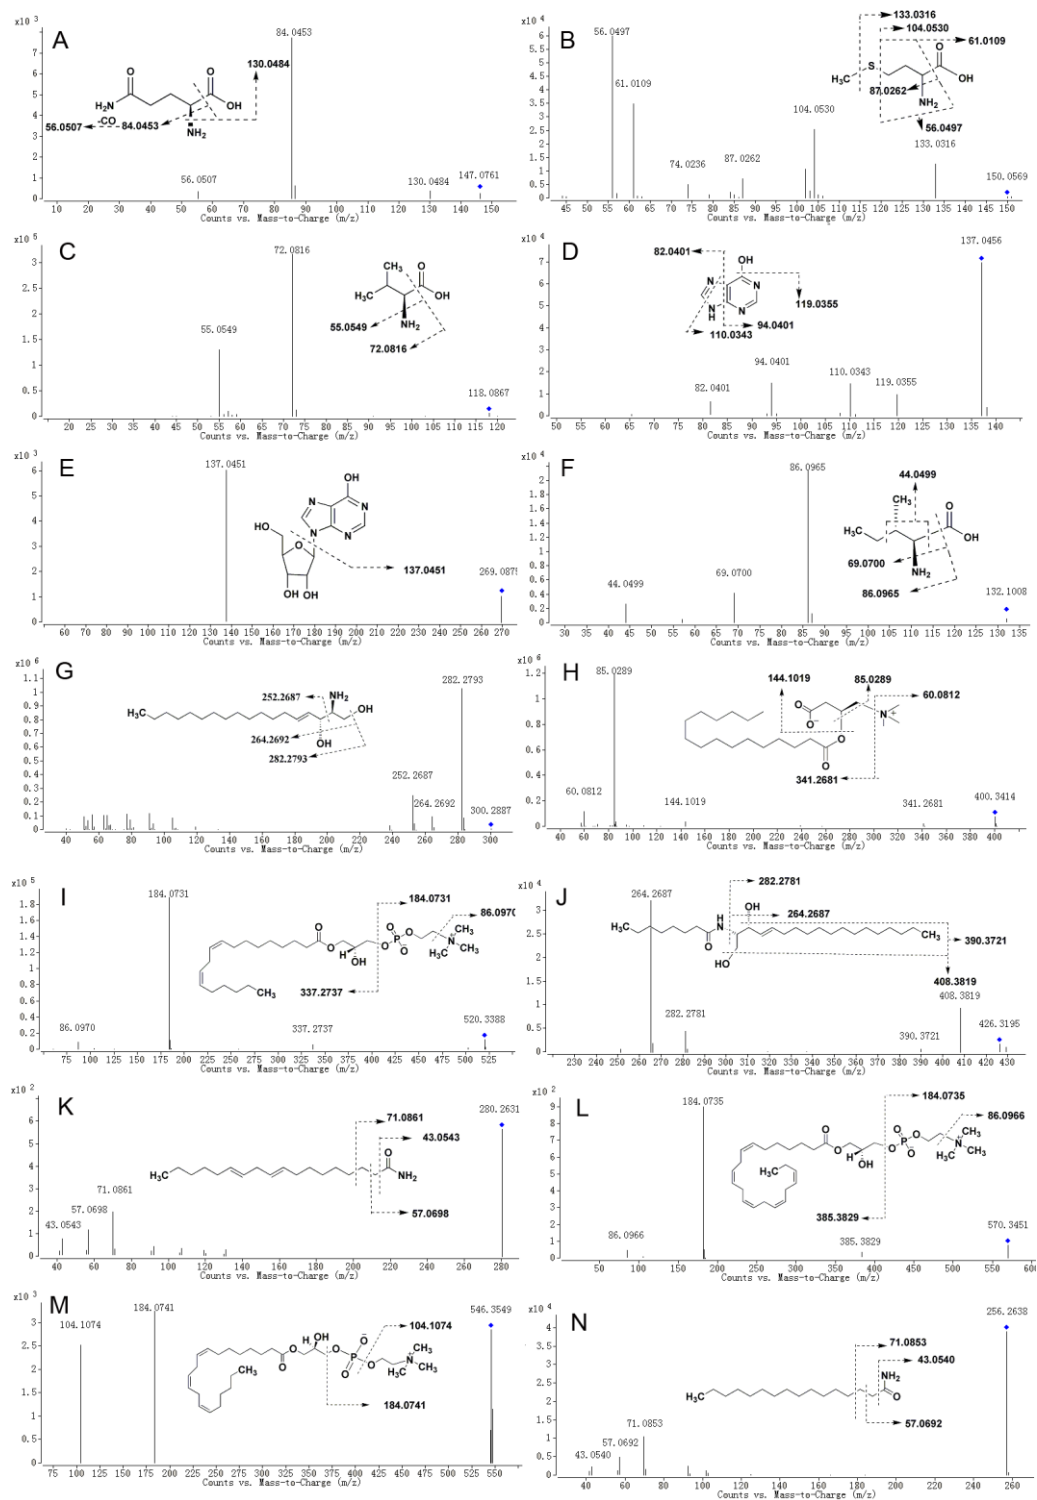

**Figure S4.** Structures and MS/MS spectra of representative metabolites. (A) Glutamine, (B)Methionine, (C)Valine, (D)Hypoxanthine, (E)Inosine, (F) Isoleucine, (G) Sphingosine, (H) Palmitoylcarnitine, (I) LysoPC(18:2), (J) C8-ceramide, (K) Linoleamide, (L) LysoPC(22:5), (M) LysoPC(20:3) and (N) Palmitic amide.
